# Supplementary material for: Allelic variants of full-length VAR2CSA, the placental malaria vaccine candidate, differ in antigenicity and receptor binding affinity
Source: PubMed Central journal article supplement (PMC8604988; doi:10.1038/s42003-021-02787-7), 2021-11-19
Supplement: 42003_2021_2787_MOESM3_ESM.pdf [file 42003_2021_2787_MOESM3_ESM.pdf]

## Description of Additional Supplementary Files

**File name:** Supplementary Data 1

**Description:** Figure source data

**File name:** Supplementary Data 2

**Description:** Biacore source data
